# Supplementary material for: Hetero-network hydrogels crosslinked with silica nanoparticles for strategic control of thermal responsive property
Source: Royal Society of Chemistry journal article supplement (doi:10.1039/d1sm00191d), 2021-01-01
Supplement: d1sm00191d1.pdf [file d1sm00191d1.pdf]

## *Supporting Information*

### **Hetero-Network Hydrogels Crosslinked with Silica Nanoparticles for Strategic Control of Thermal Responsive Property**

M. Maria Rahman,<sup>a,b</sup> Md. Ashraful Alam,<sup>c</sup> Hirotaka Ihara,<sup>a,d</sup> Makoto Takafuji<sup>a\*</sup>

<sup>a</sup> *Department of Applied Chemistry and Biochemistry, Faculty of Advanced Science and Technology, Kumamoto University, 2-39-1 Kurokami, Chuo-ku, Kumamoto, Japan.*

<sup>b</sup> *Department of Chemistry, Faculty of Science, Jagannath University, Dhaka-1100, Bangladesh.*

<sup>c</sup> *Department of Applied Chemistry and Chemical Engineering, Faculty of Engineering and Technology, Noakhali Science and Technology University, Noakhali, Sonapur-3814, Bangladesh.*

<sup>d</sup> *Okinawa College, National Institute of Technology, 905 Henoko, Nago, Okinawa, 905-2192, Japan.*

Corresponding author Email: [takafuji@kumamoto-u.ac.jp](mailto:takafuji@kumamoto-u.ac.jp)

Figure S1

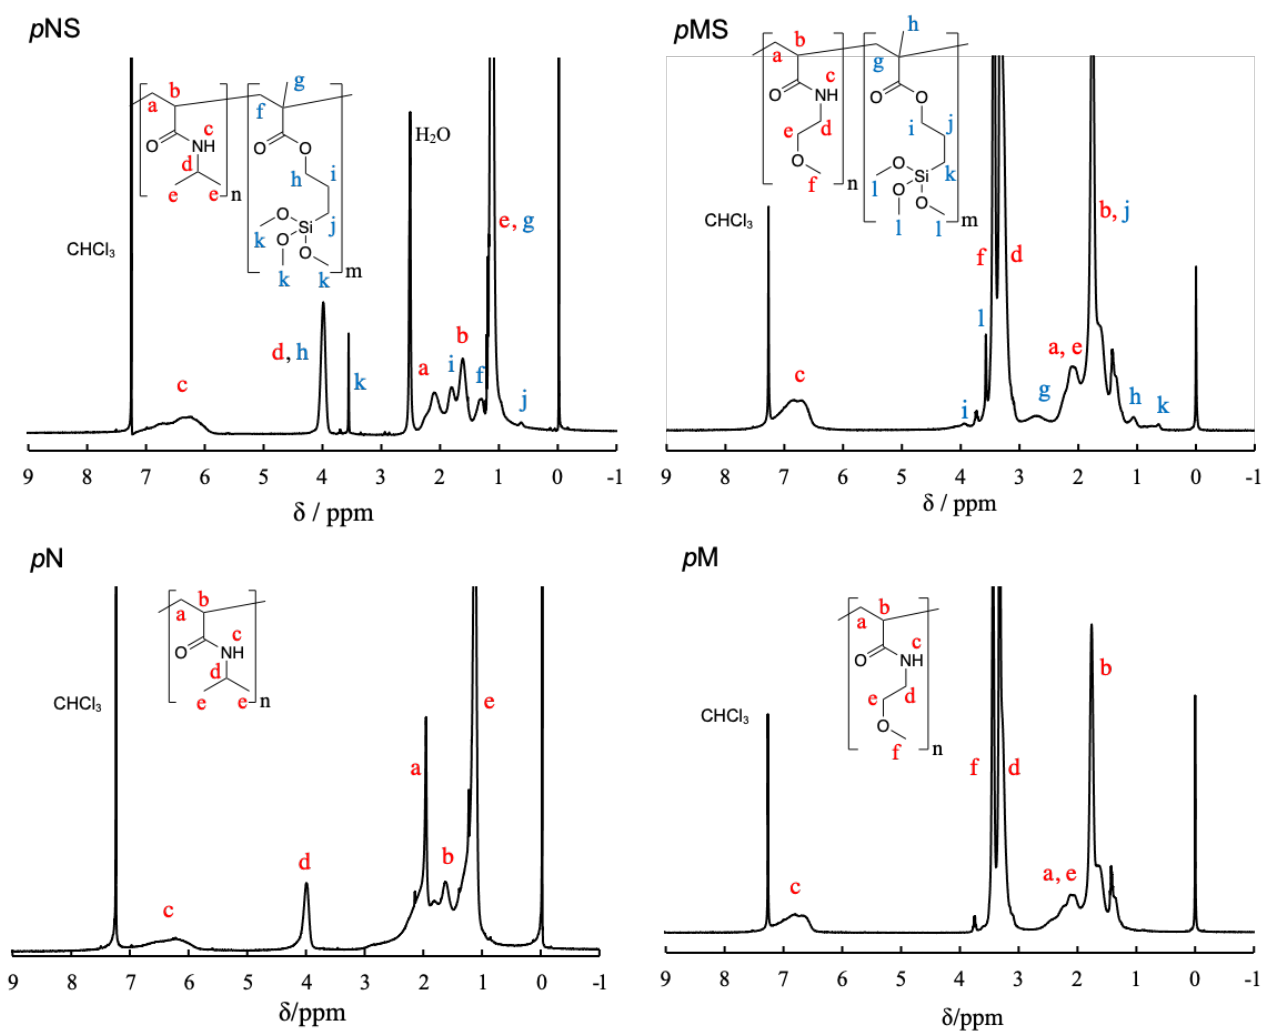

Fig. S1  $^1\text{H}$  NMR spectra of thermo-sensitive polymers (*pN*, *pM*) and co-polymers (*pNS*, *pMS*).

Figure S2

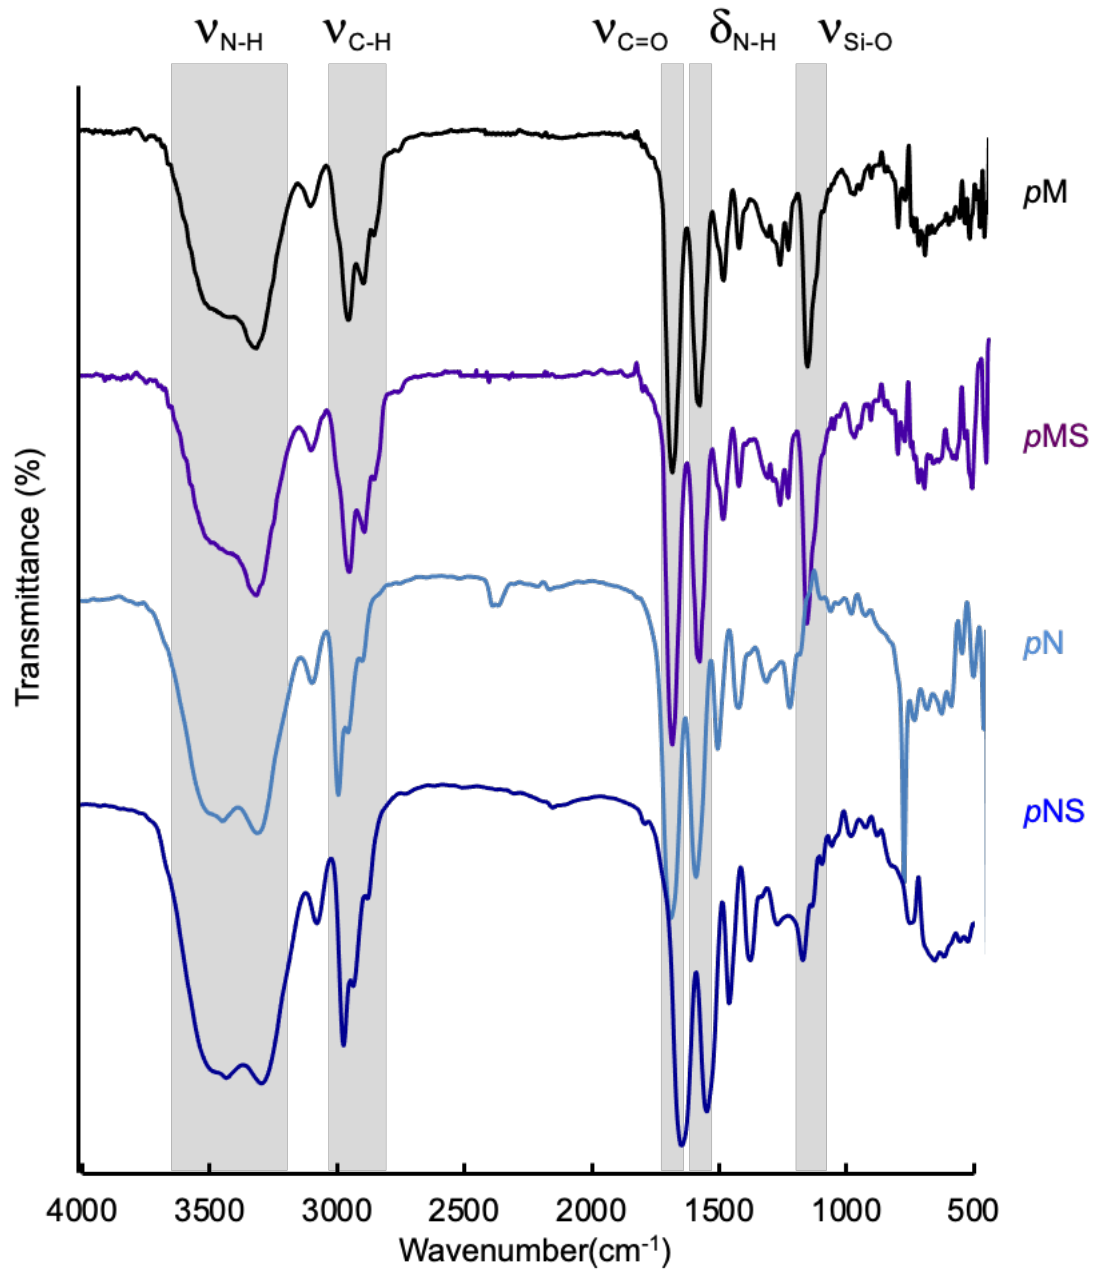

Fig. S2 FT-IR spectra of thermo-sensitive polymers (*pN*, *pM*) and co-polymers (*pNS*, *pMS*).

**Table S1**Table S1. Gelation time of aqueous solutions of *p*NS, *p*MS and mixture of *p*NS and *p*MS, with Si.<sup>a</sup>

| Si (wt.%) | <i>p</i> NS (wt%) |        |        |        | <i>p</i> MS (wt%) |        |        |        | mixture of <i>p</i> NS and <i>p</i> MS <sup>b</sup> (wt%) |        |        |        | <i>p</i> N (wt%) | <i>p</i> M (wt%) |
|-----------|-------------------|--------|--------|--------|-------------------|--------|--------|--------|-----------------------------------------------------------|--------|--------|--------|------------------|------------------|
|           | 2                 | 3      | 4      | 5      | 2                 | 3      | 4      | 5      | 2                                                         | 3      | 4      | 5      |                  |                  |
| 0.0       | NG                | NG     | NG     | NG     | NG                | NG     | NG     | NG     | NG                                                        | NG     | NG     | NG     |                  |                  |
| 2.5       | 31.5 h            | 28.4 h | 4.0 h  | 90 min | 8.5 h             | 6.0 h  | 2.8 h  | 50 min | 9.0 h                                                     | 7.2 h  | 3.1h   | 80 min |                  |                  |
| 5.0       | 8.2 h             | 7.5 h  | 2.1 h  | 35 min | 6.2 h             | 3.4 h  | 65 min | 25 min | 7.2 h                                                     | 4.0 h  | 76 min | 30 min |                  |                  |
| 10.0      | 5.8 h             | 4.5 h  | 70 min | 22 min | 4.0 h             | 2.1 h  | 30 min | 13 min | 4.6 h                                                     | 2.8 h  | 40 min | 16 min | NG               | NG               |
| 15.0      | 2.7 h             | 1.8 h  | 45 min | 15 min | 2.2 h             | 78 min | 20 min | 7 min  | 2.0 h                                                     | 85 min | 28 min | 12 min |                  |                  |

<sup>a</sup> Gelation time was measured at 25 °C by tube inversion method and Si nanoparticles size 12 nm (average diameter). NG indicates that no gelation was observed within 3 weeks. <sup>b</sup> Concentration were equal in mixture of *p*NS and *p*MS

**Figure S3**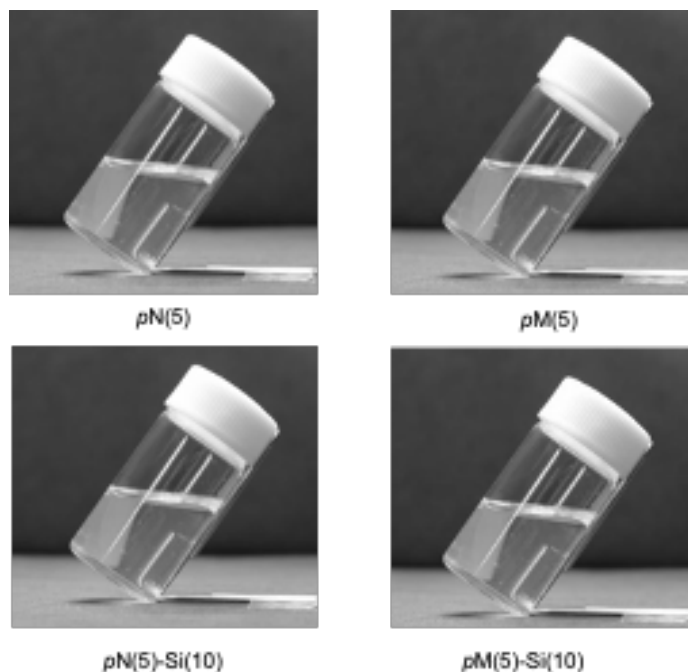**Fig. S3.** Photos of aqueous solution of homo-polymers (*p*N and *p*M) with and without Si suspension at 25 °C.

**Figure S4**

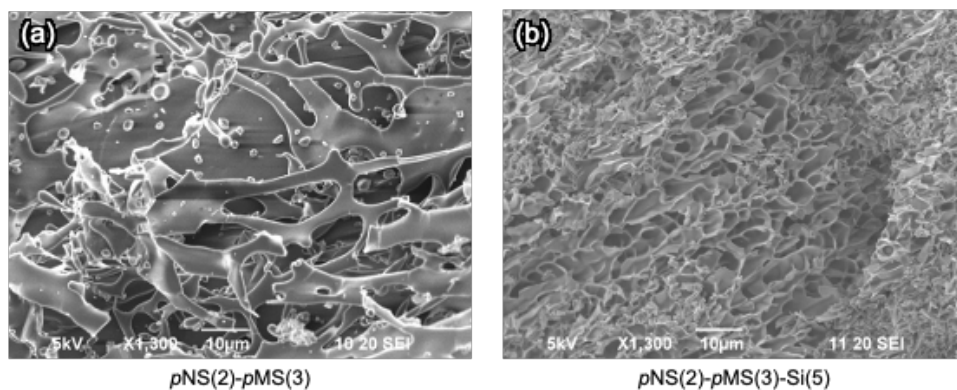

**Fig. S4.** FE-SEM microphotographs of cross-sectional morphology of freeze-dried (a) copolymers,  $pNS(2)-pMS(3)$  solution and (b)  $pNS(2)-pMS(3)-Si(5)$  hydrogel.

**Figure S5**

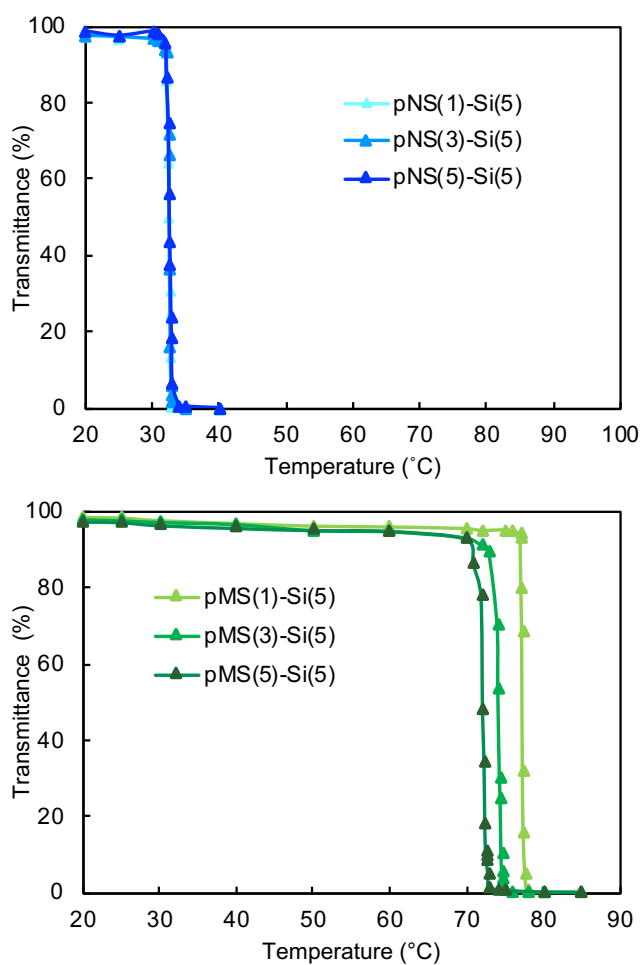

**Fig. S5** Phase transition behavior of (a)  $pNS-Si$  and (b)  $pMS-Si$  in the cooling process.

**Figure S6**

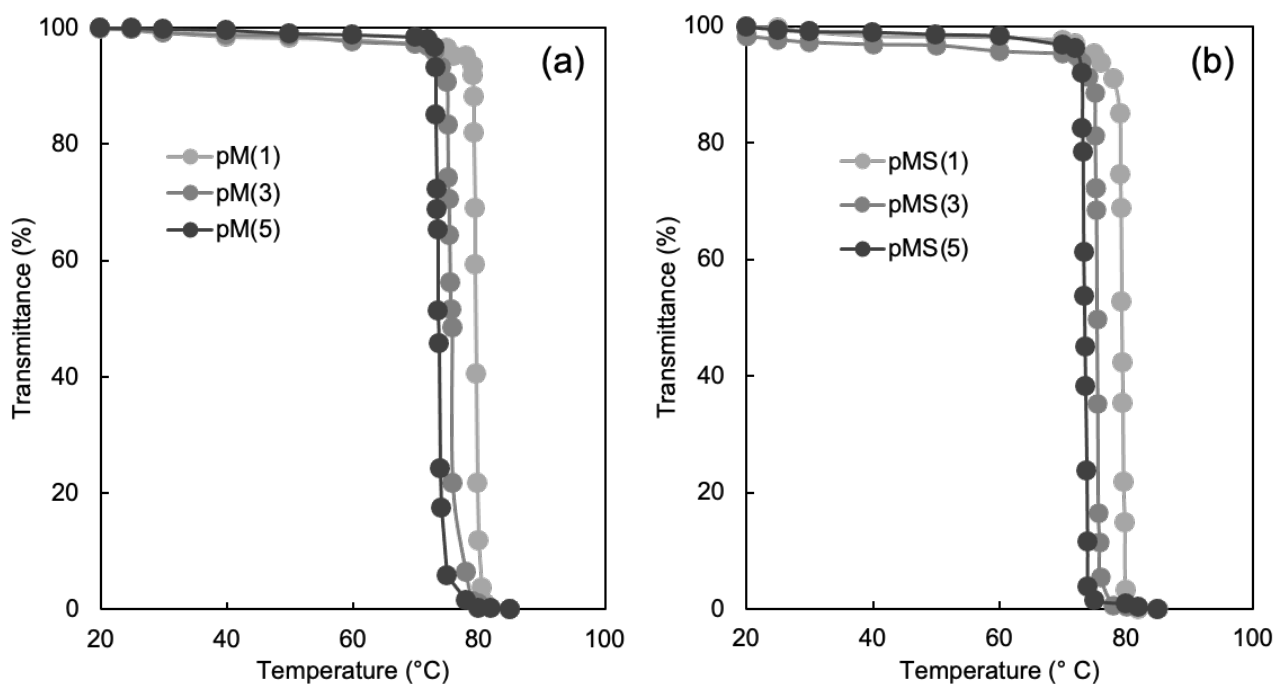

**Fig. S6** Phase transition behavior of (a) *pM* and (b) *pMS* at different concentrations.

**Figure S7**

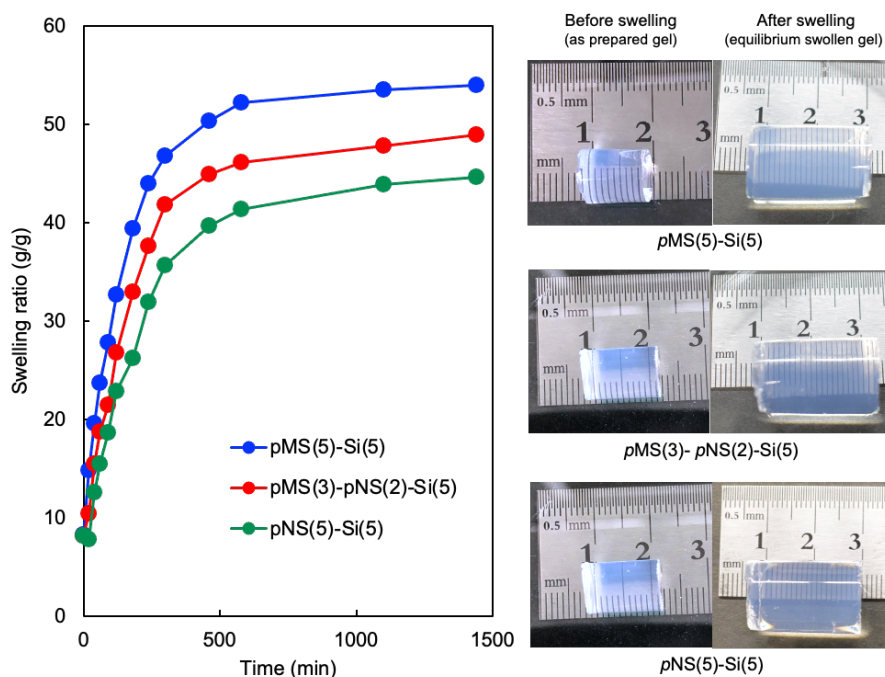

**Fig. S7** Swelling profile of hydrogels in distilled water at 20 °C and photographs show the as prepared hydrogel and equilibrium swollen hydrogels at 20 °C after 24 h.

**Figure S8**

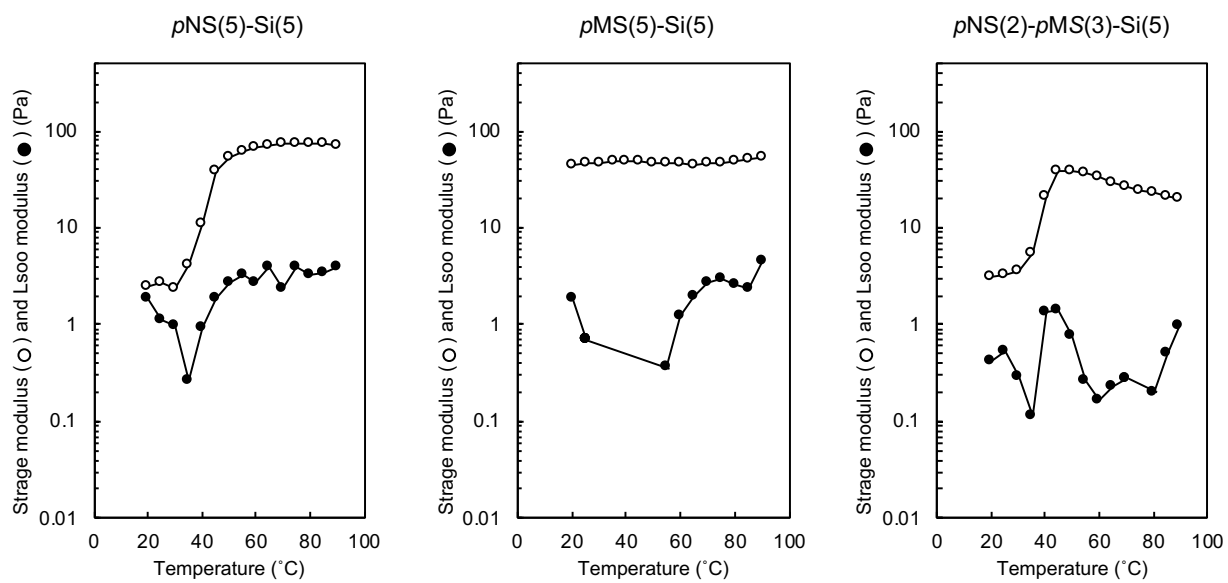

**Fig. S8** Temperature dependencies of  $G'$  and  $G''$  of the hetero-network hybrid hydrogels.
